# Supplementary material
Source: PubMed Central journal article supplement (PMC1458915)

**A**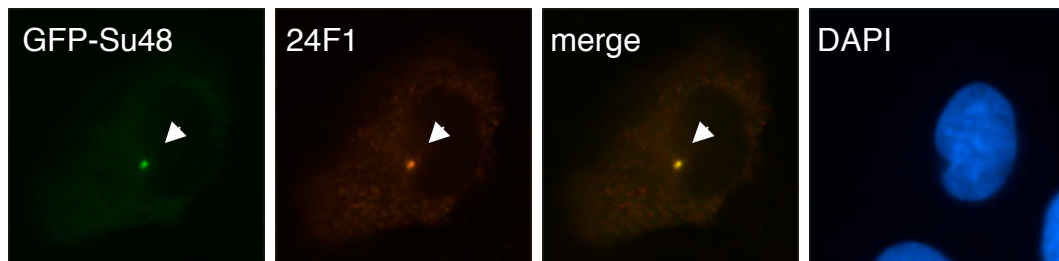**B**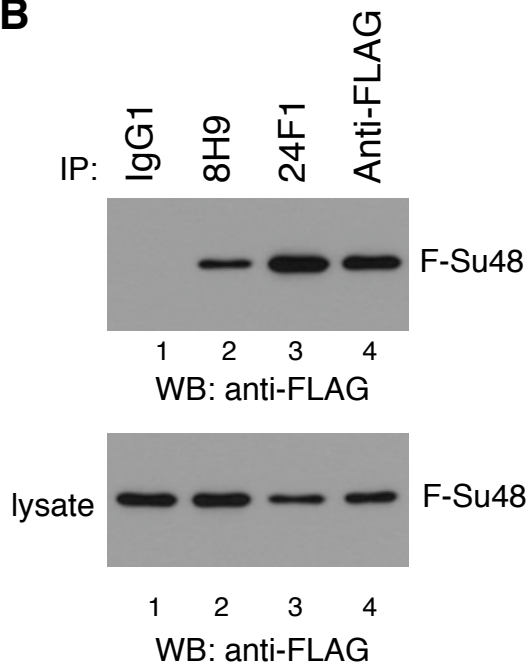**C**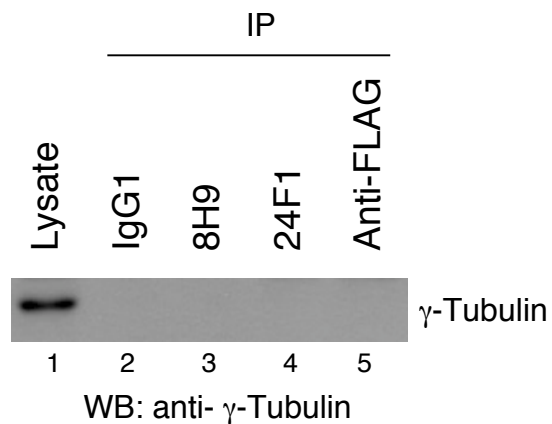

Supplement: pnas_0601682103_2.pdf [file pnas_0601682103_2.pdf]
